# Supplementary material for: A two-stage column protocol for the separation of Cu from geological materials and high-precision Cu isotopic analysis on a MC-ICP-MS
Source: Royal Society of Chemistry journal article supplement (doi:10.1039/d1ja00314c), 2022-01-01

A two-stage column protocol for the separation of Cu from geological material and high-precision Cu isotopic analysis on MC-ICP-MS

Fig. S1 Elution curves of the Cu purification procedures using Cu-selective resin in different concentration of HNO<sub>3</sub>.

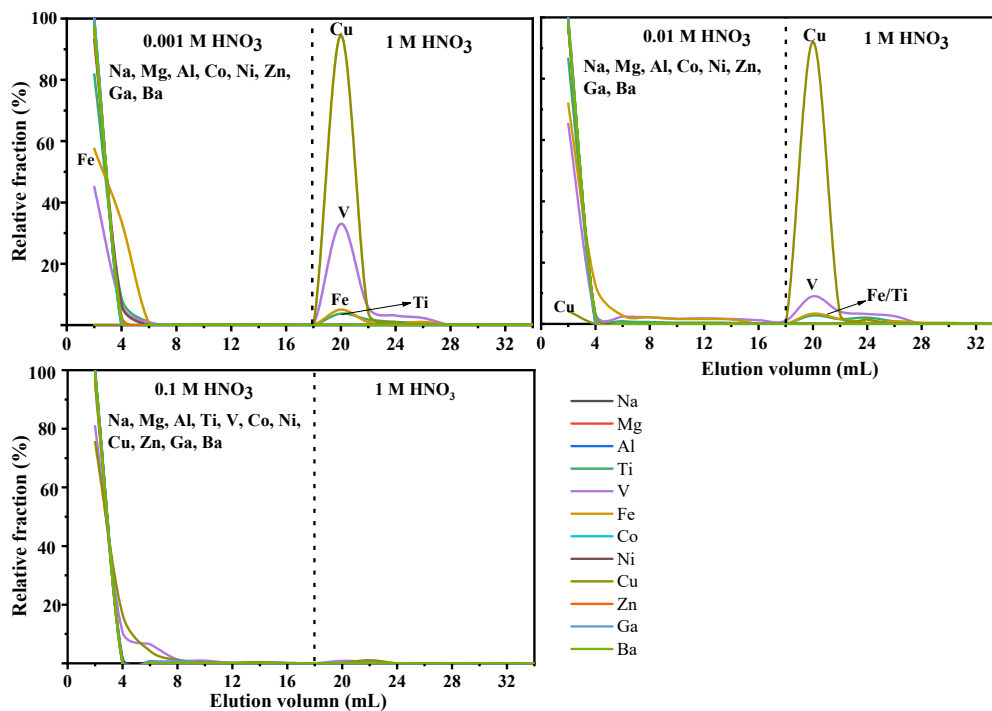

Fig. S2 Elution curves of the Cu purification procedures using Cu-selective resin in different concentration of HCl.

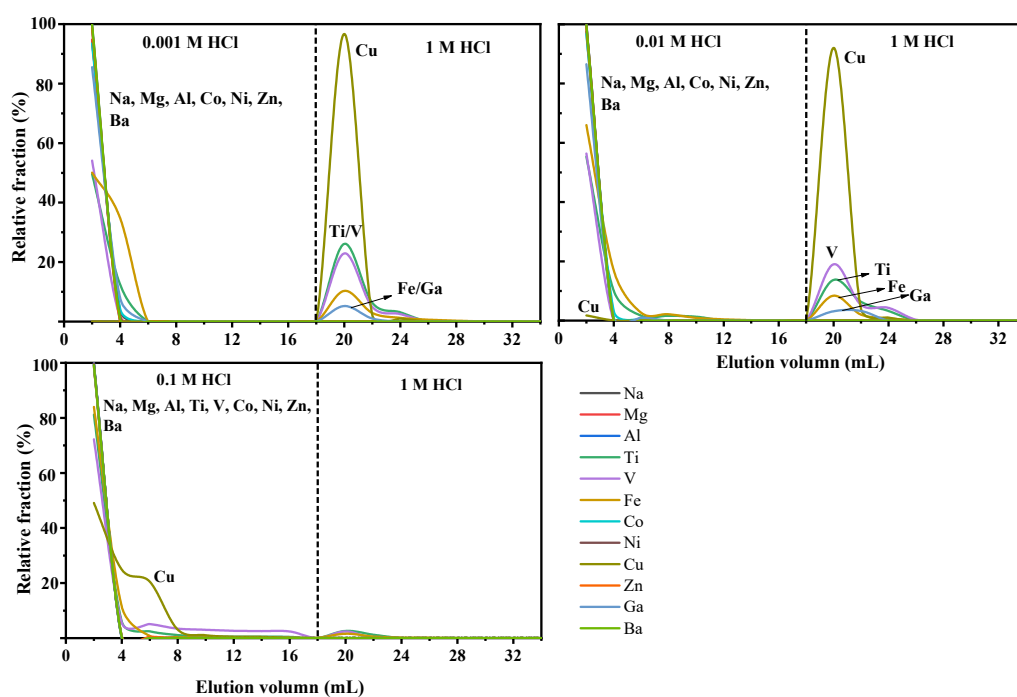

Fig. S3 Elution curves of the Cu purification procedures using Cu-selective resin in different flow rate. The flow rate of (a) was 0.3 mL min<sup>-1</sup>, while (b) is 0.08 mL min<sup>-1</sup>.

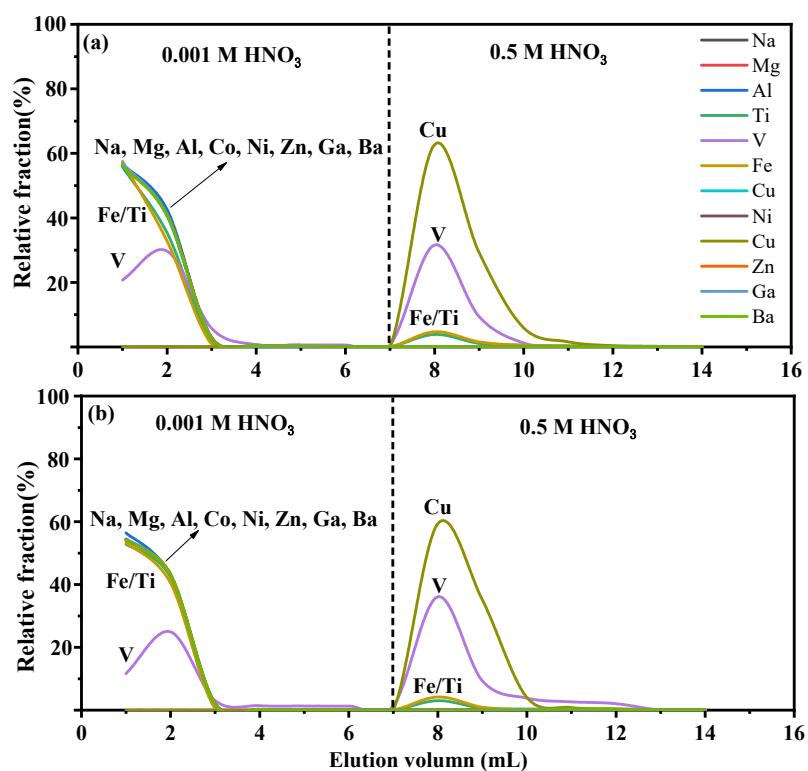

Fig. S4 Measurement of standard solutions (a) NUW-Cu-A and (b) NUW-Cu-B, and the purified (c) BHVO-2 using Zn doping method ( $Zn_{SRM\ 3168a}$ ). Error bars represent 2 standard errors of each measurement. The horizontal line represents the mean  $\delta^{65}Cu$  value. The grey area represents twice the standard deviation of the  $\delta^{65}Cu$  value of NUW-Cu-A, NUW-Cu-B and BHVO-2.

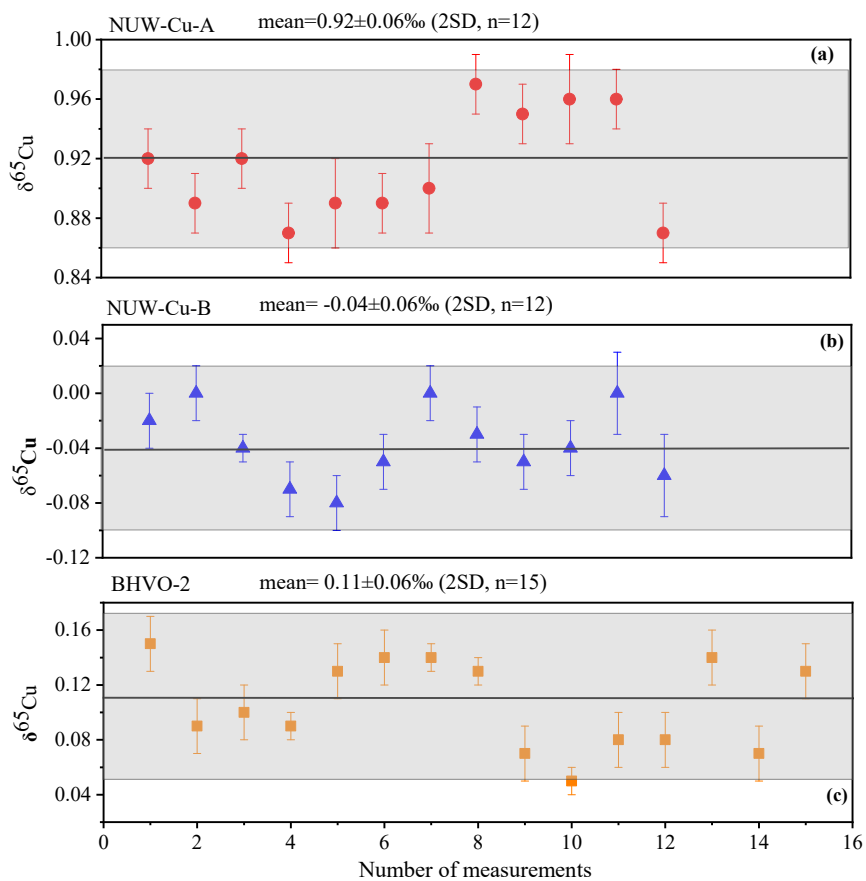

Supplement: d1ja00314c1.pdf [file d1ja00314c1.pdf]
